# Supplementary material for: Novel copper borate ceramics with lithium-based sintering aids for LTCC terahertz applications
Source: Royal Society of Chemistry journal article supplement (doi:10.1039/d2tc04429c), 2023-01-01
Supplement: d2tc04429c1.pdf [file d2tc04429c1.pdf]

## SUPPLEMENTARY INFORMATION

### Novel copper borate ceramics with lithium-based sintering aids for LTCC terahertz applications

Dorota Szwagierczak<sup>a</sup>, Beata Synkiewicz-Musialska<sup>a</sup>, Jan Kulawik<sup>a</sup>, Elżbieta Czerwińska<sup>b</sup>,  
Norbert Pałka<sup>b</sup>

<sup>a</sup>Łukasiewicz Research Network - Institute of Microelectronics and Photonics, Kraków  
Division, ul. Zabłocie 39, 30-701 Kraków, Poland

<sup>b</sup>Military University of Technology, Institute of Optoelectronics, ul. S. Kaliskiego 2, 00-908  
Warszawa, Poland

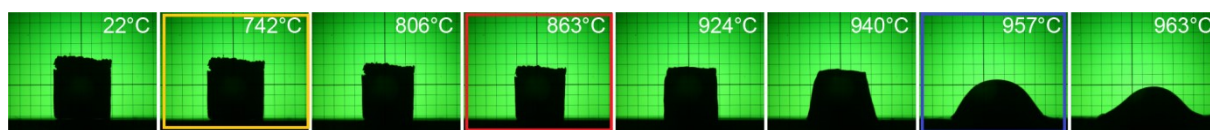

**Fig. S1** Fig. 1 Selected hot-stage microscope images taken during heating in the temperature range 22-963°C for 75% CuB<sub>2</sub>O<sub>4</sub> - 25% Cu<sub>3</sub>B<sub>2</sub>O<sub>6</sub> ceramics doped with 5mol% Li<sub>2</sub>WO<sub>4</sub>. The characteristic temperatures are marked by the coloured frames – temperature of the start of shrinking (yellow), optimal sintering temperature (red), melting temperature (blue).

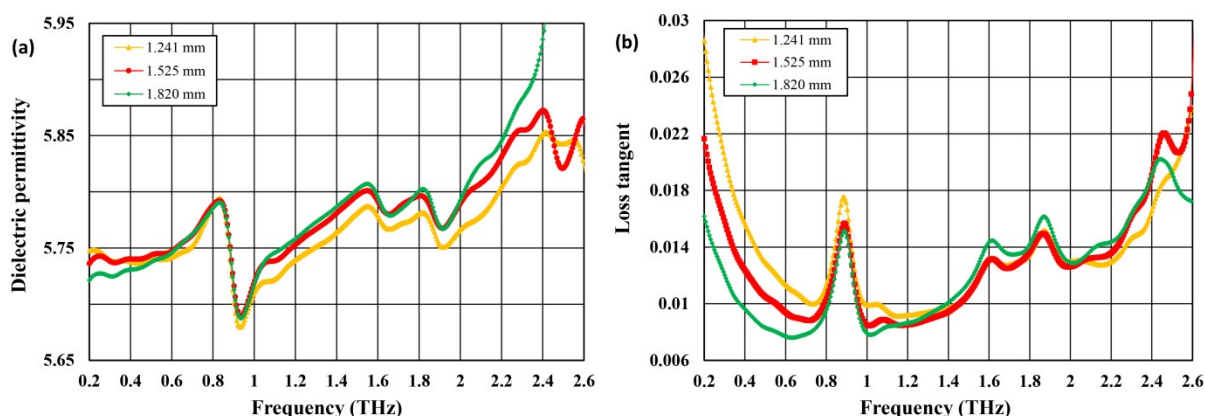

**Fig. S2** Frequency dependence in the 0.2-2.6THz range for the dielectric permittivity (a) and loss tangent (b) for 75wt% CuB<sub>2</sub>O<sub>4</sub> – 25wt% Cu<sub>3</sub>B<sub>2</sub>O<sub>6</sub> ceramics doped with 5.7mol% LiBO<sub>2</sub> with different thicknesses

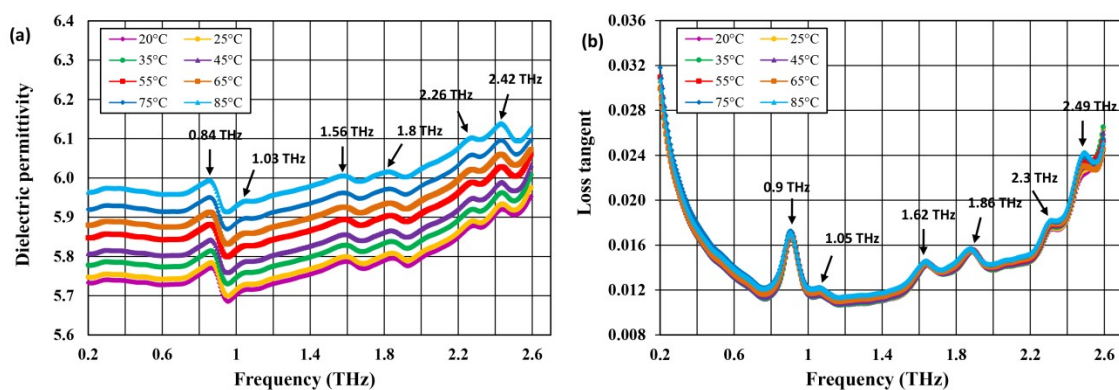

**Fig. S3** Frequency dependence in the 0.2-2.6 THz range for the dielectric permittivity (a) and loss tangent (b) for 75% CuB<sub>2</sub>O<sub>4</sub> - 25% Cu<sub>3</sub>B<sub>2</sub>O<sub>6</sub> ceramics doped with 5mol% Li<sub>2</sub>WO<sub>4</sub> at various temperatures in the 20-85°C range
